# Implementation of Male-Specific Motivational Interviewing in Malawi: An Assessment of Intervention Fidelity and Barriers to Scale-Up

Katherine Ničev Holland<sup>1</sup>, Julie Hubbard<sup>2</sup>, Misheck Mphande,<sup>3</sup> Isabella Robson,<sup>2,3</sup> Khumbo Phiri,<sup>3</sup> Dorina Onoya PhD, Elijah Chikuse,<sup>3</sup> Kathryn Dovel PhD,<sup>2,3</sup> Augustine Choko PhD<sup>3</sup>

1 David Geffen School of Medicine, UCLA, Los Angeles, USA

2 Division of Infectious Diseases, David Geffen School of Medicine at UCLA, Los Angeles, USA

3 Department of Science, Partners in Hope, Lilongwe, Malawi

4 Health Economics and Epidemiology Research Office, Faculty of Health Sciences, University of Witwatersrand, Johannesburg, South Africa

§ Corresponding author: Katherine Ničev Holland

Department of Medicine, David Geffen School of Medicine at UCLA  
10833 Le Conte Ave 37-121  
Los Angeles, CA, 90095, USA  
330-858-6890  
[knholland@mednet.ucla.edu](mailto:knholland@mednet.ucla.edu)

E-mail addresses of authors:

KNH: [knholland@mednet.ucla.edu](mailto:knholland@mednet.ucla.edu)

JH: [juliannehubbard@outlook.com](mailto:juliannehubbard@outlook.com)

MM: [misheck@pihmalawi.com](mailto:misheck@pihmalawi.com)

IR: [IRobson@mednet.ucla.edu](mailto:IRobson@mednet.ucla.edu)

KP: [khumbo@pihmalawi.com](mailto:khumbo@pihmalawi.com)

DO: [donoya@heroza.org](mailto:donoya@heroza.org)

EC: [elijah@pihmalawi.com](mailto:elijah@pihmalawi.com)

KD: [KDovel@mednet.ucla.edu](mailto:KDovel@mednet.ucla.edu)

AC: [augutc@gmail.com](mailto:augutc@gmail.com)

Keywords: Adherence, ARV, Key & Vulnerable Populations, Retention, Treatment, Africa

Word count:

Abstract: 334

Main text: 3499

## 1 **Abstract**

2 **Introduction:** Treatment interruption (TI), defined as >28 days late for ART appointment, is one  
3 of the greatest challenges in controlling southern African HIV epidemics. Negative client-provider  
4 interactions remain a major reason for TI and barrier for return to care, especially for men.  
5 Motivational interviewing (MI) facilitates client-driven counseling and improves client-provider  
6 interactions by facilitating equitable, interactive counseling that helps clients understand and  
7 develop solutions for their unique needs. Fidelity of MI counseling in resource-constrained health  
8 systems is challenging.

9 **Methods:** We developed a male-specific MI curriculum for Malawian male TI clients. Four  
10 psychosocial counselors (PCs, a high-level Malawian counseling cadre) received a 2.5-day  
11 curriculum training and job-aid to guide MI counseling approaches. They participated in monthly  
12 phone-based discussions with their manager about MI-based solutions to challenges faced. PCs  
13 implemented the MI curriculum with men >15 years who were actively experiencing TI. Clients  
14 were found at home (through tracing) or at the facility (for those who returned to care on their  
15 own). MI counseling sessions were recorded, transcribed, translated into English, and coded in  
16 Atlas.ti v9. MI quality was assessed using a modified version of the validated Motivational  
17 Interviewing Treatment Integrity tool. The tool has two measures: 1) counts of key MI behaviors  
18 throughout the session (questions, reflections, etc.); and 2) overarching scores (using a five-point  
19 scale) that characterize three MI dimensions for an entire counseling session (cultivating change  
20 talk, partnership, and empathy).

21 **Results:** 44 MI sessions were recorded and analyzed between 4/1/22-8/1/22. 64% of counseling  
22 sessions focused on work and travel as the main reason for TI. 86% of sessions yielded client-  
23 driven, tailored solutions for overcoming TI. PCs implemented multiple MI behaviors very well:  
24 asking questions, giving information, simple reflections, and client affirmation. Few PCs used  
25 complex reflection, emphasized autonomy, or sought collaboration with clients. Among  
26 overarching MI dimensions, HCWs scored high in partnership (promoting client-driven  
27 discussions) and cultivating change talk (encouraging client-driven language and behavior change  
28 confidence) but scored sub-optimal in empathy. Only 5 sessions had confrontational/negative PC  
29 attitudes.

30 **Conclusions:** PCs implemented MI with fidelity and quality resulting in tailored, actionable plans  
31 for male re-engagement in HIV treatment in Malawi.

32 Clinical Trial Number: NCT05137210 and NCT04858243

### 33 **Introduction**

34 Treatment interruption (TI) from HIV care is one of the most pressing challenges to controlling  
35 HIV epidemics in eastern and southern Africa [1-3]. In Malawi, TI is defined as being >28 days  
36 late for an ART refill appointment. In the region, it is estimated that 32-46% of clients on ART  
37 experience TI within the first five years on treatment [4-6], and 30-40% of clients experience repeat  
38 TI [7-8]. Men experience TI at a 15-26% higher rate than women [9] and have worse HIV  
39 outcomes like increased morbidity, mortality, and viremia [10-11]. As such, while countries like  
40 Malawi are quickly approaching aggregate UNAIDS 95-95-95 targets, young men aged 15-34  
41 have largely fallen behind [12].

42

43 Resource limitations have been noted to increase rates of provider compassion fatigue and  
44 withdrawal [13], resulting in poor client-provider interactions that both contribute to male TI and  
45 diminish male return to care [14]. Providers often describe men as being “ill-informed,”  
46 “difficult,” “selfish,” and overall “bad clients [15].” These biases may reflect in inequitable client-  
47 provider power dynamics and can result in men avoiding HIV services [14,16]. The hierarchical  
48 structure of health systems further entrenches this by positioning providers as the expert on a  
49 client’s situation rather than as a collaborator working alongside the client [13]. The result is  
50 predominantly didactic, authoritative counseling that fails to address individualized needs of  
51 clients [13,17]. Given these issues, the World Health Organization (WHO) has increasingly called  
52 for HIV services geared toward person-centered approaches [16].

53

54 Person-centered care (PCC) is an umbrella term for services that center client respect, client  
55 engagement in informed decision-making, and support for holistic client needs (physical,  
56 psychological, and social) [14,18-20]. Specific PCC techniques, like motivational interviewing  
57 (MI), promote responsive counseling and client-driven solutions that may help to address barriers  
58 to care. MI is a counseling technique aimed at strengthening a clients’ internal motivation,  
59 commitment to behavioral change, and development of individualized action plans that promote

60 sustained behavior change [21]. MI has been associated with increased ART adherence and  
61 decreased incidence of sexual risk taking [22,23], and qualitative data suggests client-driven  
62 counseling techniques such as MI are deeply desired by male ART clients [24,25].

63  
64 Despite its advantages, MI is infrequently utilized given the extensive resources required that are  
65 rarely available in these low-resource settings (e.g., increased personnel time, higher level of  
66 personnel training, and increased monitoring and evaluation). Other challenges to regional  
67 implementation include poor fidelity (including poor uptake of “the spirit of MI” and its core  
68 behaviors, namely empathy and reflective listening) [26,27], and poor session attendance [22].  
69 Furthermore, there is no evidence on MI as a tool for men living with HIV (MLHIV).

70  
71 To improve client-provider interactions and support men experiencing TI in Malawi, we developed  
72 a male-specific MI curriculum and assessed quality and fidelity of its implementation by  
73 psychosocial counselors (PC).

74

## 75 **Materials & Methods**

### 76 **Setting**

77 We developed a male-specific MI curriculum for male TI clients and implemented it across 8  
78 facilities in Malawi from April 1-August 31 2022. All health facilities were supported by Partners  
79 in Hope, a PEPFAR implementing partner that supports HIV service delivery in over 100 facilities  
80 serving >200,000 people living with HIV across Malawi. We purposively selected facilities to  
81 include large public district hospitals (n=3) and small health centers (n=5), in the central (n=4) and  
82 southern (n=4) regions.

83

### 84 **Male-Specific MI Curriculum**

85 The MI curriculum was composed of two parts. First, an introductory guide was developed to  
86 describe the MI approach and help PC’s develop the needed skills to implement MI. This included  
87 guidance on how to (1) build rapport with clients, including discussing their hopes and goals for  
88 the future; (2) support clients to identify their personal barriers to care; (3) explore the potential  
89 benefits of treatment adherence and connect these benefits with the clients’ goals; (4) encourage  
90 clients’ decision making for change, and; (5) help clients set their own short- and long-term goals

91 related to HIV treatment. Our training materials were developed using the REDI Framework and  
92 training guide curriculum developed by Engender Health to aid in client contraception choice [28].  
93 It is one of the few examples of MI-based client-centered care in the region. Second, a male-  
94 specific MI job aid was developed to be used during one-time counseling sessions. We used  
95 literature on barriers to men's HIV care [29-31] and formative qualitative research [15, 32-37] to  
96 identify 11 key domains related to barriers to men's use of HIV treatment. The job aid provided  
97 an overview of each topic to sensitize the PC on common challenges to men's use of HIV treatment  
98 and probes to understand the unique barriers, priorities, and resources of each individual client.  
99 Each domain had MI related discussion prompts to facilitate client-led discussions and solutions.  
100 These were organized by 'Think' and 'Act' questions. 'Think' prompts were used to help the client  
101 identify the barrier to care or to reframe the challenge to gain a better understanding of how it  
102 could be overcome. 'Act' prompts were meant to support the client's decisions for change and  
103 were used to explore actionable ways of overcoming the challenge. A brief description is provided  
104 in Appendix A.

105

### 106 **PC Training**

107 Four PC, a high-level Malawian counseling cadre, received a 2.5-day curriculum training  
108 comprised of 1) sensitization to the challenges and needs of men as ART clients; 2) education on  
109 best practices for male-specific MI, including building rapport, exploring barriers to HIV care,  
110 decision making for overcoming challenges, and strategizing how to implement them; and 3)  
111 practice of key MI skills through role play and peer feedback. A key focus throughout the training  
112 was the co-creation of actionable next steps for improving clients ART adherence. After the  
113 training, PC participated in monthly phone-based discussions with their manager for group  
114 feedback and discussion about challenges and solutions for implementing the male-specific MI  
115 curriculum.

116

### 117 **Implementation**

118 Men who were  $\geq 15$  years, living in study facility catchment areas, and not currently in HIV care  
119 (defined as never initiated ART or experiencing treatment interruption (missed an ART  
120 appointment  $\geq 7$  days or defaulted (out of care  $> 28$  days)) or having a high viral load ( $> 1,000$   
121 copies/ml) were offered the male-specific MI curriculum. Routine medical charts and health

122 registers were reviewed to identify potentially eligible men. Each PC was responsible for MI  
123 implementation at two health facilities. Per standard of care, PC actively traced potentially eligible  
124 men to offer male-specific MI counseling. Men were recruited either through this community  
125 tracing, or at health facilities if they returned for their ART refill and were flagged as recently  
126 having a TI or high viral load. All identified men were screened for eligibility and, if eligible,  
127 asked for oral consent to record a one-time MI counseling session.

128

### 129 **Measuring Fidelity & Quality in Counseling Sessions: MITI**

130 We measured the quality of MI components within counseling sessions using a modified version  
131 of the Motivational Interviewing Treatment Integrity tool (MITI), a validated scale to assess MI  
132 competencies and provide feedback on the fidelity and quality of MI interactions [38]. We utilized  
133 two key measures from the tool: 1) objective counts of key MI behaviors throughout the session;  
134 and 2) subjective overarching ‘global’ ratings (using a five-point Likert scale) for domains  
135 characterizing the ‘spirit’ of MI (see Appendix B). Some domains from the tool (including  
136 Softening Sustain Talk, Persuade with Permission and Persuade) were not included in our analysis  
137 due to the cultural context and the fact that some themes from MITI cannot be measured well via  
138 transcripts. Behaviors were classified as “simple” versus “complex” in accordance with whether  
139 the behavior in question is common to traditional counseling (e.g., asking questions, giving  
140 information, simple reflection, affirmation) versus if the behavior is more unique to MI-based  
141 counseling (e.g., complex reflection, seeking collaboration, emphasizing autonomy).

142

143 In addition to the MITI tool measures, we also assessed PC’s abilities to problem solve and develop  
144 next steps to overcome adherence challenges. We rated sessions as ‘effective’ if actionable next  
145 steps were created to address the session’s client-identified barriers, or ‘not effective’ if no  
146 actionable next steps were created.

147

### 148 **Data Analysis**

149 MI counseling sessions were recorded, transcribed, and translated into English for analysis. We  
150 completed structured memos based on the MITI scale to measure fidelity and quality, including  
151 frequency of MI behaviors and ratings of MI domains. Transcripts were reviewed and key data  
152 was extracted and entered into the memo, including simple excerpts of text that reflected strong or

153 weak implementation of MITI domains. Transcripts were simultaneously coded in Atlas.ti v.9  
154 using codes for each of the MITI behaviors to aid in the behavior counts and domains to ensure all  
155 content related to themes were captured in their entirety. Client reasons for TI, counts of global  
156 rating scores and key MI behaviors per interview were analyzed in Excel.

157

### 158 **Ethics Statement**

159 The IDEaL trial is registered with ClinicalTrials.gov (NCT05137210) and was approved by the  
160 UCLA and NHSRC of Malawi IRB. Men were recruited either through this community tracing,  
161 or at health facilities if they returned for their ART refill and were flagged as recently having a TI  
162 or high viral load. All identified men were screened for eligibility and, if eligible, asked for oral  
163 consent to record a one-time MI counseling session.

164

### 165 **Results**

166 Overall, 44 counseling sessions were conducted. Counseling session duration ranged from 6-60  
167 minutes, with an average of 27 minutes (IQR: 18.75). All sessions were completed by male PCs  
168 with a minimum of three years' counseling experience prior to the study (mean: 5.65 years'  
169 experience).

### 170 **Client Type and Reason for TI**

171 Client type was recorded for 36/44 counseling sessions. Twenty men (45%) had been out of care  
172 for > 28 days, fifteen (34%) had missed an ART appointment by 7 days, one (2%) had high viral  
173 load, and 8 (18%) were unrecorded. Across the 44 counseling sessions, participating men most  
174 frequently cited “work & travel” (n=28, 64%) as their main reason for TI. Other reasons for TI  
175 included difficulty “remembering appointment and medication schedules” (n=5, 11%) and feelings  
176 of “loneliness, isolation, and lack of social support” (n=4, 9%).

177

### 178 **Application of Key MI Behaviors**

179 We measured frequency of the eight key MI behaviors throughout each counseling session. While  
180 no ‘target frequency’ exists for any of the MI behaviors, PC most frequently employed simple MI  
181 behaviors (e.g., giving information, asking questions, simple reflection, and affirmation).  
182 Advanced behaviors (e.g., complex reflection, seeking collaboration, and emphasizing autonomy)



183 were less frequently utilized. PC overwhelmingly used the seven positive MI behaviors and rarely  
 184 used the one negative behavior, confrontation, marked as being antithetical to the ‘spirit of MI.’  
 185 Only 11% of counseling sessions (n=5) had one or more instances where the PC demonstrated  
 186 confrontational behavior (Table 1).

187 **Table 1. Key MI Behavior Instances**

| MI Behavior                       | Mean  | Standard Deviation |
|-----------------------------------|-------|--------------------|
| Giving Information                | 8.32  | 7.40               |
| Asking Questions                  | 35.45 | 26.09              |
| Simple Reflection                 | 5.18  | 5.20               |
| Complex Reflection                | 0.80  | 1.13               |
| Affirmation                       | 4.07  | 3.56               |
| Seeking Collaboration             | 0.36  | 0.69               |
| Emphasizing Autonomy              | 0.32  | 0.77               |
| Confrontation (Negative Behavior) | 0.16  | 0.53               |

188 Legend of table: Mean number of behavior instances per interview, with variance

189 **Most Frequently Used Behaviors**

190 PC relied heavily on the four simple MI behaviors. Giving information and asking questions were  
 191 the most frequently utilized. Information was given to resolve knowledge gaps while asking  
 192 questions worked to identify these gaps and push the conversation deeper. PC utilized simple  
 193 reflection primarily to help clients feel heard and understood. PC echoed client’s words back to  
 194 them to indicate that they were paying attention or to give the client opportunity to clarify and  
 195 reinforce their own thought processes. PC used affirmation to acknowledge a client’s positive  
 196 attributes and to encourage the positive aspects of a client’s behavior even when the overarching  
 197 behavioral theme resulted in negative outcomes, like treatment interruption (Table 2).

198 **Table 2. Qualitative Examples of Frequently Utilized MI Behaviors in Action**

| MI Behavior        | Utility                                | Quote                                                                                                                                                                                                                                                                                     |
|--------------------|----------------------------------------|-------------------------------------------------------------------------------------------------------------------------------------------------------------------------------------------------------------------------------------------------------------------------------------------|
| Giving Information | Resolve knowledge gaps                 | <b>PC:</b> <i>I also want to remind you to take your health passport with you when you travel long distances so when you run out of drugs, you can get an emergency supply from the nearby facility there.</i>                                                                            |
| Asking Questions   | Identify knowledge gaps                | <b>PC:</b> <i>Do you also have other things that you would like us to discuss?</i><br><b>Client:</b> <i>I was told that if you adhere to treatment, you reduce risk of transmitting the disease to your wife, if you are not sleeping around. Is it true?</i>                             |
|                    | Deepen the conversation                | <b>Client:</b> <i>I was sick.</i><br><b>PC:</b> <i>Can you explain?</i><br><b>Client:</b> <i>The illness left me unable to walk; I had to be carried— I started swelling and had wounds which were not healing. When I realized my body was deteriorating, I restarted the medication</i> |
| Simple Reflection  | Make clients feel heard and understood | <b>PC:</b> <i>Thank you for your explanation. Just to see if I have understood you well, you have said in the morning you take one pill per day and in the evening, Bactrim.</i>                                                                                                          |

It is made available under a [CC-BY 4.0 International license](https://creativecommons.org/licenses/by/4.0/).

|             |                                                                                               |                                                                                                                                                                                                                                                                                                                                                                                              |
|-------------|-----------------------------------------------------------------------------------------------|----------------------------------------------------------------------------------------------------------------------------------------------------------------------------------------------------------------------------------------------------------------------------------------------------------------------------------------------------------------------------------------------|
|             | Clarify discussion points                                                                     | <b>PC:</b> <i>Can you clarify the point where you have referred to yourself as being “blinded by the devil?”</i>                                                                                                                                                                                                                                                                             |
|             |                                                                                               | <b>PC:</b> <i>If I have got it correctly, you have taken two children from your first marriage, the other children died. But you don't have a child with the current wife?</i>                                                                                                                                                                                                               |
|             | Recapitulate core client points                                                               | <b>PC:</b> <i>Let me just recap what you have said. I appreciate that you have explained you are aware of the importance of taking ARVs. You said that if one doesn't take ARVs, the body is never healthy, and you don't look good.</i>                                                                                                                                                     |
| Affirmation | Acknowledge positive client attributes                                                        | <b>PC:</b> <i>You can even be an example to others that are struggling with treatment for you claim that you don't hide it.</i>                                                                                                                                                                                                                                                              |
|             |                                                                                               | <b>PC:</b> <i>Thank you. Let me thank you very much because of how you are making your explanations. It shows that you followed the counseling from the beginning meticulously. Because if you had not listened to the counseling or if you didn't know, you wouldn't have been able to speak like you are doing today.</i>                                                                  |
|             |                                                                                               | <b>PC:</b> <i>You have done a very important thing. It is indeed important to have something that can be reminding you so that you don't miss your dates.</i>                                                                                                                                                                                                                                |
|             | Acknowledge positive aspects of client behavior despite overarching negative behavioral theme | <b>PC:</b> <i>Let me also appreciate that when you heard the message you didn't hesitate, there was good communication and you also followed through with the promise that you made saying you will come on a certain day, and you have come today. For that, we thank you. You explained very well that there was a mistake because you went to [another clinic, not your home clinic].</i> |
|             |                                                                                               | <b>PC:</b> <i>First of all, we should appreciate you for coming to the hospital immediately after you arrived yesterday because you were asked to be here. You were tired with the trip, but you still made sure that you should respect our call.</i>                                                                                                                                       |

199 Legend of table: Summary of most used MI behaviors, with example quotes

## 200 **Least Frequently Used Behaviors**

201 PC rarely used advanced MI behaviors. When used, complex reflections allowed PC to distill a  
 202 client's thought into key points, pushing the conversation forward by both extracting and  
 203 emphasizing salient emotions and themes that arose throughout the client's words. Even rarer  
 204 was the use of seeking collaboration. However, when used, it emphasized power sharing and  
 205 allowed the client to drive the conversation in a direction most suitable for their personal needs.  
 206 Emphasizing autonomy was the least utilized positive MI behavior among PC. Despite this, its  
 207 implementation was critical to fostering client buy-in by dispelling notions of being forced or  
 208 shamed into regular medication adherence.

209 While infrequent, confrontation (negative MI behavior) did occur. PC reverted to confrontational  
 210 language when they felt their clients were not being honest and when they felt they needed to  
 211 correct behaviors they viewed as negative (Table 3).

212 **Table 3. Qualitative Examples of Infrequently Utilized MI Behaviors in Action**

| MI Behavior           | Utility                                 | Quote                                                                                                                                                                                                                                                                                                                                                                                                                                                                                                     |
|-----------------------|-----------------------------------------|-----------------------------------------------------------------------------------------------------------------------------------------------------------------------------------------------------------------------------------------------------------------------------------------------------------------------------------------------------------------------------------------------------------------------------------------------------------------------------------------------------------|
| Complex Reflection    | Emphasize and push conversation forward | <b>PC:</b> <i>It seems that the fears are there, that is why you come here [to this hospital instead of a closer hospital]. However, this suggests to me that there might be others, as well, from where you come from who can also come here to seek medical attention [but don't].</i>                                                                                                                                                                                                                  |
| Seeking Collaboration | Emphasize Power Sharing                 | <b>PC:</b> <i>I am someone who is readily available to assist you. Do you have any comment or concern that we should discuss? Something that can be helping you in your daily life?</i>                                                                                                                                                                                                                                                                                                                   |
|                       |                                         | <b>Client:</b> <i>I take my medication at 7am but my worry is on what will happen if I am late with an hour, what will be the result and how can I go about it?</i>                                                                                                                                                                                                                                                                                                                                       |
|                       |                                         | <b>PC:</b> <i>I will come in but before that, what do you think?</i><br><b>Client:</b> <i>There are other medications which have a period. If you are within the specified hours, you can take them. With other medications, it is rumored that you can take two tablets instead of one but let me learn from you on this one. I guess this is why we are here, as men, to discuss these issues. I have never been counselled regarding this and I have never asked before. I guess this is my chance</i> |
|                       |                                         | <b>PC:</b> <i>Going back a bit, you asked me about the sort of care that you will be getting with respect to the treatment, considering also that you have epilepsy. Would you like us to discuss those issues now?</i><br><b>Client:</b> <i>It is possible because I want to understand and become aware.</i>                                                                                                                                                                                            |
| Emphasizing Autonomy  | Foster Buy-in                           | <b>PC:</b> <i>We are all men and when discussing, we understand each other. You also have the right to say what you think. Final decision comes from you. We don't have a problem with that.</i>                                                                                                                                                                                                                                                                                                          |
|                       |                                         | <b>PC:</b> <i>As you are aware, we are not as strict as the police here at the hospital. We recommend what you should do in the treatment, and we rely on you to be a responsible person and adhere. However, the choice is yours.</i>                                                                                                                                                                                                                                                                    |
| Confrontation         | Entrench power hierarchies              | <b>PC:</b> <i>There should be something that made you afraid. You need to be open with me.</i>                                                                                                                                                                                                                                                                                                                                                                                                            |
|                       |                                         | <b>PC:</b> <i>What should be done, then? Because I feel like you are imposing your responsibility on her, which is not okay. You will be the one suffering for not adhering. You should claim ownership and let the wife be there only to assist.</i>                                                                                                                                                                                                                                                     |

213 Legend of table: Summary of least used MI behaviors, with example quotes

214 **Creating Actionable Next Steps**

215 Across the 44 counseling sessions, ninety-one percent of counseling sessions resulted in  
 216 actionable next steps for at least one barrier to care and 86% developed solutions for all  
 217 identified barriers (See Appendix C examples). With the support of PC, men developed plans for  
 218 overcoming barriers to care including disclosure to close male friends, posting ARV reminders  
 219 on their bedroom walls, and having a plan in place for unanticipated travel, among others.

220 Four out of the 44 sessions did not yield actionable steps; the sessions identified as failing to  
221 yield next steps were all focused on ‘work and travel’ as the primary barrier to care. Of the four  
222 instances where no next steps were given for the topic of “work & travel,” two involved the  
223 client not having adequate transport to attend the facility and two involved one-off instances of  
224 illness while traveling which prevented return to the facility. Counseling discussions suggested  
225 particular difficulty overcoming time and cost associations with work and travel.

## 226 **Quality of MI by Global Ratings**

227 Global ratings for elements that represented the ‘spirit of MI’ – cultivating change talk,  
228 partnership, and empathy – were graded on a 1 (lowest) to 5 (highest) scale for each counseling  
229 session (Table 4).

230 **Table 4. Central Tendency and Spread of Global Rating Scores Per Interview**

| Global Rating           | Mean Score | Standard Deviation | Median Score | Mode Score |
|-------------------------|------------|--------------------|--------------|------------|
| Cultivating Change Talk | 3.16       | 1.72               | 3            | 5          |
| Partnership             | 3.80       | 1.44               | 4            | 5          |
| Empathy                 | 2.75       | 1.28               | 3            | 3          |

231 Legend of table: Mean, median, and mode global rating score per interview, with variance

## 232 **Partnership**

233 PC generally scored best in partnership, or their ability to convey an understanding that expertise  
234 and wisdom about change resides mostly within the client, with a mean score of 3.8. PC displayed  
235 partnership through statements that highlighted wisdom residing in the client themselves and by  
236 using terminology that offered the client an equal position in the discussion. When PC used  
237 language to convey partnership, it elicited higher-level engagement from the client; rather than  
238 simply listening, the client began to actively participate and offer their critical thoughts on the  
239 subject at hand. This helped build rapport and the client’s sense of agency in crafting a plan toward  
240 treatment re-initiation. Most commonly, partnership came in the form of questions that evoked  
241 solutions from the client, but it occasionally came in the form of explicit statements calling for  
242 equality.

243

244 Despite scoring well in partnership, several exchanges between clients and PC signaled that clients  
245 were resistant to, or initially did not accept, the PC’s bid for partnership. One such example is seen  
246 below where the client appears to be either expecting or asking for a more traditional, didactic  
247 interaction with the PC:

248 **PC:** *The medication is not compatible with you. Okay, so do you know how we solve this*  
249 *problem?*

250 **Client:** *You tell me.*

251

## 252 **Cultivating Change Talk**

253 PC also achieved good scores for cultivating change talk, marked by the mentor actively  
254 encouraging the client’s own language in favor of the change goal, with a mean score of 3.16.

255 Cultivating change talk occurred through extended back and forth dialogue between the PC and  
256 client whereby the PC would help identify a cause of treatment interruption and explore the barrier  
257 with broad, open-ended, and evocative questions that required the client to consider the issue at  
258 hand from multiple angles. The result was often that the client would come to a conclusion that  
259 aligns with traditional PC recommendations but on their own accord.

260

## 261 **Empathy**

262 PC received the lowest scores for empathy, with an average mean score of 2.75. When employed,  
263 PC used empathic language to demonstrate that they saw the client as a human and understood that  
264 perfection is not always a reasonable goal. They emphasized that one must give themselves grace  
265 while on treatment—the client should not wait to start treatment until they can adhere perfectly;  
266 everyone forgets at times and persevering is what matters. PC also expressed empathy by  
267 apologizing on behalf of the health system for negative experiences the client endured in the past  
268 even when the PC was not directly responsible for the negative interaction. Mostly commonly,  
269 empathy was expressed in the form of “as men” statements which sought to express to the client  
270 that the PC understood, as a fellow man, that there are many conflicting responsibilities that can  
271 make adhering to treatment particularly difficult (Table 5).

272 **Table 5. Qualitative Examples of Global Rating Dimensions**

| Global Rating | Utility                       | Quote                                                                                                                                                                                                                                                                                                                               |
|---------------|-------------------------------|-------------------------------------------------------------------------------------------------------------------------------------------------------------------------------------------------------------------------------------------------------------------------------------------------------------------------------------|
| Partnership   | Evoke client-driven solutions | <b>PC:</b> <i>You said you started taking ARVs a few years ago. In your own opinion, how would ARV adherence help with your other responsibilities in life?</i><br><b>Client:</b> <i>It would give me longer life and allow me to both care for my children and carry out the responsibilities I was elected for in my village.</i> |

It is made available under a [CC-BY 4.0 International license](https://creativecommons.org/licenses/by/4.0/).

|                         |                                                           |                                                                                                                                                                                                                                                                                                                                                                                                                                                                                                                                                                                                                                                                                                                                                                                                                                                                                                                                                                                                                                                             |
|-------------------------|-----------------------------------------------------------|-------------------------------------------------------------------------------------------------------------------------------------------------------------------------------------------------------------------------------------------------------------------------------------------------------------------------------------------------------------------------------------------------------------------------------------------------------------------------------------------------------------------------------------------------------------------------------------------------------------------------------------------------------------------------------------------------------------------------------------------------------------------------------------------------------------------------------------------------------------------------------------------------------------------------------------------------------------------------------------------------------------------------------------------------------------|
|                         |                                                           | <p><b>PC:</b> <i>What have you learned from this situation? How can we solve this problem [of ART adherence]?</i></p> <p><b>Client:</b> <i>Firstly, I have indeed missed the full month. In past times, we used to leave our phone numbers here and they would either call or visit us as a reminder, often offering ART adherence counseling, as well.</i></p>                                                                                                                                                                                                                                                                                                                                                                                                                                                                                                                                                                                                                                                                                             |
|                         | Explicitly call for equality                              | <p><b>PC:</b> <i>You call me [HCW's first name]. Don't call me boss but take me as a fellow man who wants to chat and discuss two or three things with you. You will learn something from me, and I will learn something from you, too.</i></p> <p><b>PC:</b> <i>What should we do so that whenever such trips happen you shouldn't compromise your treatment? I just want us to understand what prevented you from coming for refill so that together we can sort out and prevent it from happening again next time.</i></p>                                                                                                                                                                                                                                                                                                                                                                                                                                                                                                                               |
| Cultivating Change Talk | Facilitate client-driven language in favor of change goal | <p><b>PC:</b> <i>Based on what you shared, you missed your appointment because you were sharing medications with your wife, correct?</i></p> <p><b>Client:</b> <i>Yes.</i></p> <p><b>PC:</b> <i>When your wife is given a 3-month refill and you share with her, what happens?</i></p> <p><b>Client:</b> <i>From my experience, it causes a huge problem for us and the healthcare workers because we end up missing appointments, and it has consequences.</i></p> <p><b>PC:</b> <i>Do you think sharing medication is a good decision?</i></p> <p><b>Client:</b> <i>It is not a good because when we are given appointments, the healthcare workers calculate how much medication we need for that period. When we share medicine, one person will not have enough.</i></p> <p><b>PC:</b> <i>What should be done then? As you said, sharing medicine with your wife disturbs both of your schedules.</i></p> <p><b>Client:</b> <i>I should talk with my wife and have her return to the facility since her dates and medications no longer align.</i></p> |
| Empathy                 | Emphasize Grace on Treatment                              | <p><b>PC:</b> <i>It is bound to happen because people are not computers. [They] happen to forget.</i></p> <p><b>PC:</b> <i>We are all humans, and by that, we do forget things. That is normal.</i></p>                                                                                                                                                                                                                                                                                                                                                                                                                                                                                                                                                                                                                                                                                                                                                                                                                                                     |

273 Legend of table: Summary of global ratings, with example quotes

## 274 Discussion

275 We assessed quality and fidelity of male-specific MI curriculum implementation by PC in routine  
 276 HIV care settings in Malawi and found that PC were able to achieve both quality and fidelity in  
 277 certain areas. Following a brief training, PC could (1) effectively use most MI behaviors with rare  
 278 instances of confrontation, (2) demonstrate successful application of MI domains, and (3) guide  
 279 counseling sessions that resulted in actionable next steps for clients to overcome TI. However, PC  
 280 demonstrated infrequent usage of advanced MI behaviors and did not display high rates of empathy  
 281 with clients suggesting that additional training or altered curricula may be needed to promote  
 282 advanced MI behaviors and global skills.

283



284 When implementing male-specific MI, PC in our study overwhelmingly relied on simple behaviors  
285 (asking questions, giving information, simple reflection, and affirmation). Despite their simplicity,  
286 these simple MI behaviors seemed to engage male clients by clearing knowledge gaps, making  
287 clients feel seen and heard, and affirming clients. Advanced MI behaviors (complex reflection,  
288 seeking collaboration, and emphasizing autonomy) were used less frequently but served to deepen  
289 conversations, center counseling on the unique needs of the client, and reaffirm that enduring  
290 solutions reside within the client, not the PC. Infrequent usage of advanced MI behaviors may  
291 reflect ingrained client-provider power dynamics and hierarchies that position providers as experts  
292 meant to direct, rather than collaborate, with a client [13]. Infrequent usage of complex behaviors  
293 may also reflect the need for additional training to advance the nuanced counseling skills necessary  
294 for deeper MI implementation. PCs' ability to engage in effective MI despite minimal use of  
295 complex MI behaviors suggests that simple, paired down MI behaviors may be sufficient to instill  
296 the 'spirit of MI' into a counseling session in contexts such as Malawi. While infrequent, rare  
297 confrontational exchanges worked to entrench typical counseling hierarchies and fortify the  
298 unequal power dynamics that MI seeks to dismantle, thus creating a more hostile environment not  
299 conducive of open dialogue.

300

301 Despite most interviews resulting in actionable next steps and being rated as 'effective,' there was  
302 wide fluctuation in behavior frequency across interviews, suggesting that there is no 'right number'  
303 of behavior frequencies required to enact high-quality MI. Frequencies of usage should be  
304 expected to be variable, fitting with the spirit of MI, which seeks to provide an individualized  
305 approach rather than a 'one-size-fits-all' approach. Effective counseling sessions also varied  
306 considerably in length, further supporting that there is no one-size-fits-all approach to quality,  
307 effective MI.

308

309 Forming actionable next step plans was critical to enacting effective MI. Ninety-one percent of  
310 counseling sessions resulted in actionable next steps for at least one barrier to care and 86%  
311 developed solutions for all identified barriers. With the support of PC, men developed plans for  
312 overcoming barriers to care including disclosure to close male friends, posting ARV reminders on  
313 their bedroom walls, and having a plan in place for unanticipated travel, among others. While rare,  
314 some sessions failed to develop plans for overcoming; this overwhelmingly occurred when the

315 reason for TI was “work & travel,” which was also the main identified reason for TI among study  
316 participants. Counseling sessions suggested that time and cost associations with work and travel  
317 may be particularly challenging to address due to their logistical nature, particularly in low-  
318 resource settings. Other literature has similarly found that many clients experience HIV treatment  
319 interruption in part due to insufficient affordable transport solutions and conflicting financial  
320 demands which are not easily resolved given current infrastructure and socioeconomic realities  
321 [39-41]. Additional novel structural interventions at the health facility level, like home ARV  
322 delivery or multi-month dispensing, may be needed to overcome these barriers, if feasible in the  
323 local context.

324

325 PC were largely proficient in two of the three core elements that represent the ‘spirit of MI,’  
326 partnership and cultivating change talk, after only 2.5 days of training. Despite success in those  
327 domains, PC scored worse in empathy. This may reflect several challenges including, but not  
328 limited to: (1) cultural practice of expressing empathy in less explicit or non-western manners [42],  
329 (2) PC practice of expressing empathy through body language rather than words, thus not flagging  
330 in transcripts, or (3) insufficient training in engaging MLHIV with empathetic statements.

331

332 The overwhelming proportion of study counseling sessions developed actionable next steps and  
333 were ultimately rated as ‘effective,’ suggesting that brief trainings focused on developing MI  
334 behaviors and low-cost job aids which remind PC of basic MI principles may be effective tools to  
335 aid basic MI implementation in routine settings. As HIV programming transitions back to  
336 ministries of health from PEPFAR [43-45], these results bode well for continued implementation;  
337 it is possible to provide high-quality, skilled MI counseling with little resources and time with  
338 minimal upfront investment.

## 339 **Conclusion**

340 Our findings are critical for understanding feasibility of providing high-quality MI counselling in  
341 resource-limited settings and will only become more relevant as funding for HIV programming  
342 across the continent becomes more constrained. Our results suggest that PC can implement high-  
343 quality MI with fidelity in a low-resource setting with brief training. While largely successful,  
344 additional training or altered curricula may help promote the lesser-seen behaviors and global



345 skills, like complex reflection or empathy. Further, “work & travel” remains a chief barrier to  
346 treatment among MLHIV and a particularly challenging barrier to care for PC and clients, alike,  
347 to overcome. Future work should focus on taking male-specific MI counseling to scale in the  
348 standard-of-care through continually simplified trainings, curricula, and monitoring and evaluation  
349 strategies. Additional areas of future focus include exploring challenges to PC engagement with  
350 advanced MI skills, like complex reflection and empathy.

351 **Competing Interests**

352 The authors declare that they have no competing interests.

353 **Authors' Contributions**

354 KD is responsible for funding acquisition. JH, MM, IR, EC and KD developed the male-specific  
355 counseling curriculum and study implementation protocol. JH, MM and IR implemented the study  
356 and collected all data. KNH, JH and KD contributed to the analysis conception. KNH and JH coded  
357 and analyzed the data with support from KD. KNH wrote the first draft and JH, MM, IR, KP, DO,  
358 EC, KD and AC edited following drafts. All authors have read and approved the final manuscript.

359 **Acknowledgements**

360 We are grateful to the male clients and HCWs who participated in the study and our IDI  
361 enumerator, McDaphton Bellos, and FGD leads Misheck Mphande and Eric Lungu who conducted  
362 the interviews. We would also like to acknowledge Partners in Hope Malawi and thank them for  
363 their partnership and collaboration.

364 **Funding**

365 The work is supported by the Bill and Melinda Gates Foundation (INV-001423) and by  
366 the National Institute of Mental Health (R01-MH122308). KD is supported by the Fogarty  
367 International K01-TW011484-01 and UCLA GSTTP. The funders had no role in study design,  
368 data collection and analysis, decision to publish, or preparation of the manuscript.

369 **Disclaimers**

370 None

371 **Data Availability Statement**

372 The data that support the findings of this study are openly available in figshare at  
373 <https://figshare.com/s/430c414b7401b8e22067> ; DOI: 10.6084/m9.figshare.26240885

374

375

376

377 **List of Abbreviations**

378 IRB: International Review Board

379 MI: motivational interviewing

380 MITI: Motivational Interviewing Treatment Integrity Tool

381 MLHIV: men living with HIV

382 NHSRC: National Health Sciences Research Council

383 PC: psychosocial counselors

384 PCC: person-centered care

385 TI: treatment interruption

386 UCLA: University of California, Los Angeles

387 WHO: World Health Organization

## 1 Appendix A: Topics & Descriptions in the Male Specific MI Curriculum

| Domain                                                     | “Think” Prompt                                                                                                                                                                                                                                                                                                        | “Act” Prompt                                                                                                                                                                                                                                                            |
|------------------------------------------------------------|-----------------------------------------------------------------------------------------------------------------------------------------------------------------------------------------------------------------------------------------------------------------------------------------------------------------------|-------------------------------------------------------------------------------------------------------------------------------------------------------------------------------------------------------------------------------------------------------------------------|
| <b>Stigma &amp; Discrimination</b>                         | Remember, HIV is a virus that affects people worldwide. There are others who have the same fears as you. You are not alone.                                                                                                                                                                                           | Do you know anyone else who is living with HIV? Let’s make a plan for you to ask to talk to them about their experience with HIV stigma and how they manage it.                                                                                                         |
| <b>Status Disclosure</b>                                   | Do you know anyone who has disclosed successfully? If so, how did they do it? How did they overcome their fears? If they disclosed to you, how did it make you feel?                                                                                                                                                  | Think about someone you want to disclose your HIV positive status to. Now let’s role play this scenario together.                                                                                                                                                       |
| <b>Disbelief &amp; Challenges with Status Acceptance</b>   | There are many people out there who choose not to test. You are being a responsible person who is choosing to know your status.                                                                                                                                                                                       | If you are struggling to accept your status, it may be helpful to get re-tested. This is always an option – would you like to make a plan ask the provider to re-test?                                                                                                  |
| <b>Poor Knowledge of ART</b>                               | Think about things about ART that you want to understand. Do you want more information about how to protect a sexual partner? Or are you curious about how you can have children now that you are HIV positive?                                                                                                       | Let’s go through your list of questions together and I will answer any of your questions I am able to answer. If I don’t have the answer, we can go to the provider together to ask so we both are able to learn.                                                       |
| <b>Side Effects</b>                                        | Many medications, such as medication for bacterial infections, Malaria, TB, cold and flu, have a risk of some side effects as our bodies adjust. IARVs can be similar. How have you overcome other side effects in the past?                                                                                          | Some side effects can be overcome with other medications that your provider can provide (exp: anti-nausea medication). Let’s make a plan to ask your provider what medications are available to help with side effects.                                                 |
| <b>Loneliness, Isolation, &amp; Lack of Social Support</b> | It can be good to realize you are not alone, that these feelings are human regardless of HIV status. Do you know anyone else, HIV positive or not, who has experienced loneliness or a lack of support?                                                                                                               | This week, let’s make a plan for you to talk to one of your trusted friends about how they can help you feel supported.                                                                                                                                                 |
| <b>Taking ART when Feeling Healthy</b>                     | We often think that ART is only for sick people. But this is not true! ART is for anyone who is HIV positive, regardless of whether they are sick or well.                                                                                                                                                            | Would you like to start ART today?                                                                                                                                                                                                                                      |
| <b>Lifelong Medication</b>                                 | The grasshopper can travel long distances even with small jumps. Every day is a small step. Being on treatment for life may feel long, but taken bit by bit, it is manageable.                                                                                                                                        | Taking medication everyday can be less burdensome when it’s integrated into your daily habits. What time is best for you to take your medication? Let’s link that time to a habit that you do every day (brushing your teeth in the morning, taking tea, etc).          |
| <b>HIV, Work, &amp; Travel</b>                             | We as men need to juggle many responsibilities at once. We can manage work commitments while still managing responsibilities like going to church, being a leader in the community, taking care of our families. Can you describe the commitments you have and how you keep these commitments and work at the moment? | What do you do if you need to take your medication at work but don’t want others to see it? Wrap the pills that you need in a small cloth pouch or plastic zip bag and keep the pills in your pocket or a safe location (i.e. a backpack) while you are away from home. |
| <b>Lifestyle (alcohol, etc)</b>                            | We know we can’t change everything about our behaviors at once. That’s okay. But we can make small changes every day to ensure we are living the as healthy as we can.                                                                                                                                                | Think about small changes that you can make to your lifestyle to take a step towards better health (i.e. one less drink/pack of cigarettes per week, making a conscious decision to be prepared with condoms before going out, etc). What’s your change?                |

It is made available under a [CC-BY 4.0 International license](#) .

|                    |                                                                                                                                                                                                                                                                            |                                                                                                                                                                                                                                                                                                                         |
|--------------------|----------------------------------------------------------------------------------------------------------------------------------------------------------------------------------------------------------------------------------------------------------------------------|-------------------------------------------------------------------------------------------------------------------------------------------------------------------------------------------------------------------------------------------------------------------------------------------------------------------------|
| <b>HIV clinics</b> | Most health programs focus on children or mothers. But YOUR health as a man is equally important because it is the main vehicle towards reaching your goals in life and keeping your family well. Think about yourself. Do you prioritise your health? How do you do this? | Next time you're at the clinic for routine health for yourself or for someone else, consider starting ART. You are already there – you've taken the time, effort, and spent the transport money to attend. You can make the trip work double for you by deciding to start during a visit you are already at the clinic. |
|--------------------|----------------------------------------------------------------------------------------------------------------------------------------------------------------------------------------------------------------------------------------------------------------------------|-------------------------------------------------------------------------------------------------------------------------------------------------------------------------------------------------------------------------------------------------------------------------------------------------------------------------|

## 1 Appendix B: Domains Included in the MITI Scale & Definitions

| Behavior Count                              | Definition                                                                                                                                                                                                                                                                                                      | Example                                                                                                                                                 |
|---------------------------------------------|-----------------------------------------------------------------------------------------------------------------------------------------------------------------------------------------------------------------------------------------------------------------------------------------------------------------|---------------------------------------------------------------------------------------------------------------------------------------------------------|
| <b>Giving information</b>                   | Mentor gives information, educates, provides feedback, or expresses a professional opinion without persuading, advising, or warning. Tone is usually neutral.                                                                                                                                                   | “It is recommended that you take your medication at the same time every day.”                                                                           |
| <b>Asking Questions</b>                     | Any question that is asked. Includes fact-finding, close-ended, and open-ended questions that cannot be answered with yes or no and are phrased in a way that require further explanation from the client.                                                                                                      | “What challenges are you facing when it comes to taking your medications?”                                                                              |
| <b>Simple Reflection</b>                    | Instances where the mentor reflective listening statements in response to client statements. Simple reflections typically convey understanding or facilitate client–mentor exchanges. These reflections add little or no meaning (or emphasis) to what clients have said.                                       | “You seem discouraged.”<br>“Things seem very stressful for you.”                                                                                        |
| <b>Complex Reflection</b>                   | Instances where the mentor uses reflective listening statements in response to client statements. Complex reflections typically add substantial meaning or emphasis to what the client has said. These reflections serve the purpose of conveying a deeper or more complex picture of what the client has said. | “It seems like it’s really hard for you to take medication every day.”                                                                                  |
| <b>Affirmation</b>                          | Instances that accentuate something positive about the client. To be considered an Affirm, the instance must be about client’s strengths, efforts, intentions, or worth.                                                                                                                                        | “It sounds like you have worked really hard to stay adherent when traveling.”                                                                           |
| <b>Seeking Collaboration</b>                | Instances where the mentor explicitly attempts to share power or acknowledge the expertise of the client. The key here is that the mentor genuinely <u>seeks consensus</u> with the client regarding tasks, goals, or directions of the session.                                                                | “Since you have not disclosed your status, would it be alright if we spent some time discussing your relationship with your family/those close to you?” |
| <b>Emphasizing Autonomy</b>                 | Instances where the mentor clearly focuses the responsibility with the client for decisions about and actions pertaining to change. They highlight clients’ sense of control, freedom of choice, personal autonomy, or ability or obligation to decide about their attitudes and actions.                       | “You are the only one who can decide which direction your life will go” “At the end of the day, it’s up to you to take your medication every day.”      |
| <b>Confrontation (Negative Interaction)</b> | Mentor directly and unambiguously disagrees, argues, corrects, shames, blames, criticizes, labels, warns, moralizes, ridicules, or questions the client’s honesty. Such interactions will have the quality of uneven power sharing, accompanied by disapproval or negativity.                                   | “You said you drink multiple times during the week. This is way too much alcohol. That is not good.”                                                    |

## 1 Appendix C: Next Step Action Plans

| Reason for Treatment Interruption               | Number of Clients with a Particular Reason for Interruption | Number of Instances with “No Next Steps” Established | Example of an Established “Next Step” for Mitigating Future Treatment Interruption                                                                                                                                                                                                                                                                                                                                                                                                                                                                                                                                                                                              |
|-------------------------------------------------|-------------------------------------------------------------|------------------------------------------------------|---------------------------------------------------------------------------------------------------------------------------------------------------------------------------------------------------------------------------------------------------------------------------------------------------------------------------------------------------------------------------------------------------------------------------------------------------------------------------------------------------------------------------------------------------------------------------------------------------------------------------------------------------------------------------------|
| Fear of Disclosure                              | 1                                                           | 0                                                    | Client is an elder and a chief and this status puts him in a precarious position when it comes to waiting in a public line for ARVs → Clinician recommends using a guardian to obtain medications.                                                                                                                                                                                                                                                                                                                                                                                                                                                                              |
| Side Effects                                    | 2                                                           | 0                                                    | Client states they previously had bad reactions to ARVs → Clinician informs client that there are new medications with lower side effect profiles. Clinician also informs client that, in the event of a medical issue like medication side effects, client should call the hospital so they can be seen by a doctor.                                                                                                                                                                                                                                                                                                                                                           |
| Loneliness, Isolation, & Lack of Social Support | 4                                                           | 1                                                    | Client’s second wife recently passed away. He is not on good terms with his first wife. Further, his biological children are far from him and his stepson in an Evangelical Christian who does not believe in hospitals and thus won’t go to them. Client feels lonely in his diagnosis → Clinician suggests that client reach out and disclose to a male friend or male relative who may be able to act as a guardian. Client thinks this is feasible and plans to do so.                                                                                                                                                                                                      |
| “But I Feel Healthy”                            | 1                                                           | 0                                                    | Client reaffirms that he feels healthy and is not in need of medications → Clinician uses a metaphor about a house that looks nice on the outside but is being destroyed by termites on the inside to express that even if you look or feel healthy now, your body is sick. Client says they understand now, and they will start taking medications so that “things should go smoothly.”                                                                                                                                                                                                                                                                                        |
| HIV & Other Responsibilities: Work & Travel     | 28                                                          | 4                                                    | Client missed their appointment because they had to return to their childhood home to help their sick mother cultivate the maize → Clinician reminds client that, in the future, when going away from their current home they can use several methods to obtain ARVs: (1) take a health passport and collect ARVs at a hospital near where they are staying, (2) use a guardian to gather medications, or (3) upon gaining trust of a provider, consider asking for multi-month medication dispensing                                                                                                                                                                           |
| HIV Clinics                                     | 3                                                           | 1                                                    | Client states that clinic lines are too long, and they don’t have time to wait → Clinician informs client that clinic is typically much quieter after 12pm and simply arriving to clinic later in the day could resolve the client’s concerns.<br><br>Client expresses immense fear of the HIV clinics and explains that his friend was once screamed at for not properly adhering to his ARVs → Clinician apologizes for the friend’s experience and lets the client know that each clinic has a suggestion box available if someone has a poor experience. Clinician then walks the client through avenues the client can take to express their feelings to a clinic manager. |
| Sharing Medications                             | 3                                                           | 0                                                    | Client did not come to clinic because his wife also have HIV and he used some of her medications rather than picking up a refill → Clinician suggests having his wife come                                                                                                                                                                                                                                                                                                                                                                                                                                                                                                      |

|                                                        |   |   |                                                                                                                                                                                                                                                                                                                                                                                                                                                       |
|--------------------------------------------------------|---|---|-------------------------------------------------------------------------------------------------------------------------------------------------------------------------------------------------------------------------------------------------------------------------------------------------------------------------------------------------------------------------------------------------------------------------------------------------------|
|                                                        |   |   | to clinic with her passport in order to receive additional ARVs to make up for those shared, client agrees to set up reminder calls with his clinic so he is not in the scenario of running out of ARVs and needing to use someone else's, and client decides to use a calendar to record upcoming appointment dates.                                                                                                                                 |
| Sickness Related Issues                                | 2 | 0 | Client missed their appointment because they were feeling sick and came to clinic once they felt better → Clinician states that, in this scenario, the client did the right thing to not send a guardian because the client also needed to get a blood draw. Clinician affirms that client should do the same thing next time (simply come to clinic as soon as he feels ok again) so long as they have enough medication around.                     |
| Trouble Remembering Appointments & Medication Schedule | 5 | 1 | Client states they are having difficulty remembering to take their medications → Clinician and client brainstorm ideas for remembering and client decides to post a timetable on their wall to remind them.                                                                                                                                                                                                                                           |
| Conversations about Lab Tests                          | 1 | 0 | Client did not understand what their lab tests meant and thus did not come to clinic → Clinician walks the client through how to read and interpret the HIV lab tests and explains that clients should ask someone at the facility, upon receipt of the results, to aid in test interpretation if there is any confusion.                                                                                                                             |
| Issues Accessing HIV-Related Services                  | 2 | 1 | Client had issues navigating HIV services → Clinician offers to escort the client in real time to pick up the client's medications so that the client will feel comfortable going forward.                                                                                                                                                                                                                                                            |
| Familial / Personal Issues                             | 1 | 0 | Client explains that, upon initial receipt of his diagnosis, he was not mentally or emotionally prepared to undergo treatment. He is currently experiencing marital strife, though, and for fear of the fate of his children, he wants to start treatment → Clinician reexplains to the client how to take his medications properly and counsels on what to do if the client must leave town.                                                         |
| Transportation                                         | 2 | 0 | Client explains that they did not come to their recent appointment because they ran out of money → Clinician and client brainstorm and decide that the client should set aside some money each month which can be used for transport. When their appointment is nearing and they find that the money is still available, they should come to the hospital while the money is available even if it means coming earlier than the set appointment date. |



## 1   **References**

- 2       1. Haas AD, Zaniewski E, Anderegg N, Ford N, Fox MP, Vinikoor M, et al. Retention and  
3       mortality on antiretroviral therapy in sub-Saharan Africa: collaborative analyses of HIV  
4       treatment programmes. *J Int AIDS Soc.* 2018 Feb;21(2):e25084.
- 5       2. Kimeu M, Burmen B, Audi B, Adegga A, Owuor K, Arodi S, et al. The relationship  
6       between adherence to clinic appointments and year-one mortality for newly enrolled HIV  
7       infected patients at a regional referral hospital in Western Kenya, January 2011-  
8       December 2012. *AIDS Care.* 2016;28(4):409–15.
- 9       3. Sikazwe I, Eshun-Wilson I, Sikombe K, Czaicki N, Somwe P, Mody A, et al. Retention  
10       and viral suppression in a cohort of HIV patients on antiretroviral therapy in Zambia:  
11       Regionally representative estimates using a multistage-sampling-based approach. *PLoS*  
12       *Med.* 2019 May;16(5):e1002811.
- 13       4. Kranzer K, Lewis JJ, Ford N, Zeinecker J, Orrell C, Lawn SD, et al. Treatment  
14       interruption in a primary care antiretroviral therapy program in South Africa: cohort  
15       analysis of trends and risk factors. *J Acquir Immune Defic Syndr.* 2010 Nov;55(3):e17-  
16       23.
- 17       5. Mee P, Rice B, Lemsalu L, Hargreaves J, Sambu V, Harklerode R, et al. Changes in  
18       patterns of retention in HIV care and antiretroviral treatment in Tanzania between 2008  
19       and 2016: an analysis of routinely collected national programme data. *J Glob Health.*  
20       2019 Jun;9(1):010424.
- 21       6. Tomescu S, Crompton T, Adebayo J, Kinge CW, Akpan F, Rennick M, et al. Factors  
22       associated with an interruption in treatment of people living with HIV in USAID-  
23       supported states in Nigeria: a retrospective study from 2000-2020. *BMC Public Health.*  
24       2021 Nov 30;21(1):2194.
- 25       7. Nakiwogga-Muwanga A, Musaaazi J, Katabira E, Worodria W, Talisuna SA, Colebunders  
26       R. Patients who return to care after tracking remain at high risk of attrition: experience  
27       from a large HIV clinic, Uganda. *Int J STD AIDS.* 2015 Jan;26(1):42–7.
- 28       8. Teklu AM, Yirdaw KD. Patients who restart antiretroviral medication after interruption  
29       remain at high risk of unfavorable outcomes in Ethiopia. *BMC Health Serv Res.* 2017  
30       Apr 4;17(1):247.
- 31       9. Chihana ML, Huerga H, Van Cutsem G, Ellman T, Goemaere E, Wanjala S, et al.  
32       Distribution of advanced HIV disease from three high HIV prevalence settings in Sub-  
33       Saharan Africa: a secondary analysis data from three population-based cross-sectional  
34       surveys in Eshowe (South Africa), Ndhiwa (Kenya) and Chiradzulu (Malawi). *Glob*  
35       *Health Action.* 2019;12(1):1679472.
- 36       10. Differences between HIV-Infected men and women in antiretroviral therapy outcomes -  
37       six African countries, 2004-2012 [Internet]. Centers for Disease Control and Prevention  
38       (CDC); 2013 Nov p. 945–52. Available from:  
39       <https://www.cdc.gov/mmwr/preview/mmwrhtml/mm6247a2.htm>

- 40 11. Ochieng-Ooko V, Ochieng D, Sidle JE, Holdsworth M, Wools-Kaloustian K, Siika AM,  
41 et al. Influence of gender on loss to follow-up in a large HIV treatment programme in  
42 western Kenya. *Bull World Health Organ*. 2010 Sep 1;88(9):681–8.
- 43 12. Malawi Country Operational Plan 2022 Strategic Direction Summary [Internet].  
44 PEPFAR; 2022. Available from: [https://www.state.gov/wp-](https://www.state.gov/wp-content/uploads/2022/09/Malawi-COP22-SDS.pdf)  
45 [content/uploads/2022/09/Malawi-COP22-SDS.pdf](https://www.state.gov/wp-content/uploads/2022/09/Malawi-COP22-SDS.pdf)
- 46 13. Man JD, Mayega RW, Sarkar N, Waweru E, Leys M, Olmen JV, et al. Patient-Centered  
47 Care and People-Centered Health Systems in Sub-Saharan Africa: Why So Little of  
48 Something So Badly Needed? *International Journal of Person Centered Medicine*  
49 [Internet]. 2016 Oct 26 [cited 2024 Jun 28];6(3):162–73. Available from:  
50 <http://www.ijpcm.org/index.php/ijpcm/article/view/591>
- 51 14. Davis K, Schoenbaum SC, Audet AM. A 2020 vision of patient-centered primary care. *J*  
52 *Gen Intern Med*. 2005 Oct;20(10):953–7.
- 53 15. Dovel K, Paneno R, Balakasi K, Hubbard J, Magaço A, Phiri K, et al. Health care  
54 workers’ perceptions and bias toward men as HIV clients in Malawi and Mozambique: A  
55 qualitative study. *PLOS Glob Public Health*. 2023;3(10):e0001356.
- 56 16. World Health Organization. Consolidated guidelines on HIV prevention, testing,  
57 treatment, service delivery and monitoring: recommendations for a public health  
58 approach: World Health Organization [Internet]. 2021 Jul. Available from:  
59 <https://www.who.int/publications/i/item/9789240031593>
- 60 17. Posse M, Meheus F, van Asten H, van der Ven A, Baltussen R. Barriers to access to  
61 antiretroviral treatment in developing countries: a review. *Trop Med Int Health*. 2008  
62 Jul;13(7):904–13.
- 63 18. Lazarus JV, Safreed-Harmon K, Kamarulzaman A, Anderson J, Leite RB, Behrens G, et  
64 al. Consensus statement on the role of health systems in advancing the long-term well-  
65 being of people living with HIV. *Nat Commun* [Internet]. 2021 Jul 16 [cited 2024 Jun  
66 28];12(1):4450. Available from: <https://www.nature.com/articles/s41467-021-24673-w>
- 67 19. Lowther K, Harding R, Simms V, Ahmed A, Ali Z, Gikaara N, et al. Active ingredients  
68 of a person-centred intervention for people on HIV treatment: analysis of mixed methods  
69 trial data. *BMC Infectious Diseases* [Internet]. 2018 Jan 10 [cited 2024 Jun 28];18(1):27.  
70 Available from: <https://doi.org/10.1186/s12879-017-2900-0>
- 71 20. Men and HIV: evidence-based approaches and interventions [Internet]. World Health  
72 Organization; 2023 [cited 2024 Jun 28]. Available from:  
73 <https://www.who.int/publications/i/item/9789240085794>
- 74 21. Hurley EA, Harvey SA, Winch PJ, Keita M, Roter DL, Doumbia S, et al. The Role of  
75 Patient-Provider Communication in Engagement and Re-engagement in HIV Treatment  
76 in Bamako, Mali: A Qualitative Study. *J Health Commun*. 2018;23(2):129–43.
- 77 22. Holstad MM, Essien JE, Ekong E, Higgins M, Teplinskiy I, Adewuyi MF. Motivational  
78 Groups Support Adherence to Antiretroviral Therapy and use of Risk Reduction  
79 Behaviors in HIV Positive Nigerian Women: A Pilot Study. *Afr J Reprod Health*

- 80 [Internet]. 2012 Sep [cited 2024 Jun 28];16(3):14–27. Available from:  
81 <https://www.ncbi.nlm.nih.gov/pmc/articles/PMC3721643/>
- 82 23. Dillard PK, Zuniga JA, Holstad MM. An integrative review of the efficacy of  
83 motivational interviewing in HIV management. *Patient Educ Couns*. 2017  
84 Apr;100(4):636–46.
- 85 24. Náfrádi L, Nakamoto K, Schulz PJ. Is patient empowerment the key to promote  
86 adherence? A systematic review of the relationship between self-efficacy, health locus of  
87 control and medication adherence. *PLoS One*. 2017;12(10):e0186458.
- 88 25. Stellefson M, Dipnarine K, Stopka C. The chronic care model and diabetes management  
89 in US primary care settings: a systematic review. *Prev Chronic Dis*. 2013;10:E26.
- 90 26. Dewing S, Mathews C, Schaay N, Cloete A, Simbayi L, Chopra M. The feasibility of  
91 implementing a sexual risk reduction intervention in routine clinical practice at an ARV  
92 clinic in Cape Town: a case study. *AIDS Behav*. 2011 Jul;15(5):905–10.
- 93 27. Mash R, Baldassini G, Mkhathswa H, Sayeed I, Ndapeua S. Reflections on the training of  
94 counsellors in motivational interviewing for programmes for the prevention of mother to  
95 child transmission of HIV in sub-Saharan Africa. *South African Family Practice*  
96 [Internet]. 2008 Mar 1 [cited 2024 Jun 28];50(2):53–9. Available from:  
97 <https://doi.org/10.1080/20786204.2008.10873697>
- 98 28. EngenderHealth. REDI: A Client-Centered Counseling Framework [Internet]. 2018.  
99 Available from: [https://www.engenderhealth.org/wp-content/uploads/imported-](https://www.engenderhealth.org/wp-content/uploads/imported-files/REDI-Trainers-Manual.pdf)  
100 [files/REDI-Trainers-Manual.pdf](https://www.engenderhealth.org/wp-content/uploads/imported-files/REDI-Trainers-Manual.pdf)
- 101 29. Nardell MF, Adeoti O, Peters C, Kakuhikire B, Govathson-Mandimika C, Long L, et al.  
102 Men missing from the HIV care continuum in sub-Saharan Africa: a meta-analysis and  
103 meta-synthesis. *J Int AIDS Soc*. 2022 Mar;25(3):e25889.
- 104 30. Phiri K, McBride K, Moucheraud C, Mphande M, Balakasi K, Lungu E, et al.  
105 Community and health system factors associated with antiretroviral therapy initiation  
106 among men and women in Malawi: a mixed methods study exploring gender-specific  
107 barriers to care. *International Health* [Internet]. 2021 May 1 [cited 2024 Jun  
108 28];13(3):253–61. Available from: <https://doi.org/10.1093/inthealth/ihaa041>
- 109 31. Hlongwa M, Jama NA, Mehlomakulu V, Pass D, Basera W, Nicol E. Barriers and  
110 Facilitating Factors to HIV Treatment Among Men in a High-HIV-Burdened District in  
111 KwaZulu-Natal, South Africa: A Qualitative Study. *Am J Mens Health*.  
112 2022;16(5):15579883221120987.
- 113 32. Coursey K, Phiri K, Choko AT, Kalande P, Chamberlin S, Hubbard J, et al.  
114 Understanding the Unique Barriers and Facilitators that Affect Men’s Initiation and  
115 Retention in HIV Care: A Qualitative Study to Inform Interventions for Men Across the  
116 Treatment Cascade in Malawi. *AIDS Behav*. 2023 Jun;27(6):1766–75.
- 117 33. Robson I, Mphande M, Phiri K, Balakasi K, Nyrienda M, Chikuse E, et al. A community-  
118 based intervention (Men’s Spaces) to engage men in HIV and sexual health services in  
119 Malawi: A pilot study. In 2020. Available from:

- 120 [https://academicmedicaleducation.com/meeting/interest-2020/abstract/community-based-](https://academicmedicaleducation.com/meeting/interest-2020/abstract/community-based-intervention-mens-spaces-engage-men-hiv-and-sexual)  
121 [intervention-mens-spaces-engage-men-hiv-and-sexual](https://academicmedicaleducation.com/meeting/interest-2020/abstract/community-based-intervention-mens-spaces-engage-men-hiv-and-sexual)
- 122 34. Dovel K, Balakasi K, Gupta S, Mphande M, Robson I, Khan S, et al. Frequency of visits  
123 to health facilities and HIV services offered to men, Malawi. *Bull World Health Organ.*  
124 2021 Sep 1;99(9):618–26.
- 125 35. Mphande M, Campbell P, Hoffman RM, Phiri K, Nyirenda M, Gupta SK, et al. Barriers  
126 and facilitators to facility HIV self-testing in outpatient settings in Malawi: a qualitative  
127 study. *BMC Public Health.* 2021 Dec 2;21(1):2200.
- 128 36. Chamberlin S, Mphande M, Phiri K, Kalande P, Dovel K. How HIV Clients Find Their  
129 Way Back to the ART Clinic: A Qualitative Study of Disengagement and Re-engagement  
130 with HIV Care in Malawi. *AIDS Behav.* 2022 Mar;26(3):674–85.
- 131 37. Hubbard JA, Mphande M, Phiri K, Balakasi K, Hoffman RM, Daniels J, et al. Improving  
132 ART initiation among men who use HIV self-testing in Malawi: a qualitative study. *J Int*  
133 *AIDS Soc.* 2022 Jun;25(6):e25950.
- 134 38. Moyers TB, Rowell LN, Manuel JK, Ernst D, Houck JM. The Motivational Interviewing  
135 Treatment Integrity Code (MITI 4): Rationale, Preliminary Reliability and Validity. *J*  
136 *Subst Abuse Treat.* 2016 Jun;65:36–42.
- 137 39. Tuller DM, Bangsberg DR, Senkungu J, Ware NC, Emenyonu N, Weiser SD.  
138 Transportation costs impede sustained adherence and access to HAART in a clinic  
139 population in southwestern Uganda: a qualitative study. *AIDS Behav.* 2010  
140 Aug;14(4):778–84.
- 141 40. Biadgilign S, Deribew A, Amberbir A, Deribe K. Barriers and facilitators to antiretroviral  
142 medication adherence among HIV-infected paediatric patients in Ethiopia: A qualitative  
143 study. *SAHARA J.* 2009 Dec;6(4):148–54.
- 144 41. Hardon AP, Akurut D, Comoro C, Ekezie C, Irunde HF, Gerrits T, et al. Hunger, waiting  
145 time and transport costs: time to confront challenges to ART adherence in Africa. *AIDS*  
146 *Care.* 2007 May;19(5):658–65.
- 147 42. Eichbaum Q, Barbeau-Meunier CA, White M, Ravi R, Grant E, Riess H, et al. Empathy  
148 across cultures - one size does not fit all: from the ego-logical to the eco-logical of  
149 relational empathy. *Adv Health Sci Educ Theory Pract.* 2023 May;28(2):643–57.
- 150 43. Ogbuoji O, Mao W, Aryeetey G. The long-term impact of COVID-19 on development  
151 assistance for health is still uncertain. *The Lancet [Internet].* 2021 Oct 9 [cited 2024 Jun  
152 28];398(10308):1280–1. Available from:  
153 [https://www.thelancet.com/journals/lancet/article/PIIS0140-6736\(21\)01448-3/fulltext](https://www.thelancet.com/journals/lancet/article/PIIS0140-6736(21)01448-3/fulltext)
- 154 44. Shroff ZC, Sparkes S, Skarphedinsdottir M, Hanson K. Rethinking external assistance for  
155 health. *Health Policy Plan.* 2022 Aug 3;37(7):932–4.
- 156 45. Zakumumpa H, Paina L, Ssegujja E, Shroff ZC, Namakula J, Ssengooba F. The impact  
157 of shifts in PEPFAR funding policy on HIV services in Eastern Uganda (2015–21).  
158 *Health Policy and Planning [Internet].* 2024 Jan 1 [cited 2024 Jun  
159 28];39(Supplement\_1):i21–32. Available from: <https://doi.org/10.1093/heapol/czad096>
